# Supplementary material for: The involvement of Canadian physicians in promoting and providing unproven and unapproved stem cell interventions
Source: PubMed Central journal article supplement (PMC5930514; doi:10.1186/s12910-018-0273-6), 2018-05-02
Supplement: 12910_2018_273_MOESM3_ESM.pdf [file 12910_2018_273_MOESM3_ESM.pdf]

```

GET
FILE='C:
\Users\uogbo\Dropbox\IMPACT GRANT\rescclinicstudycodingframe\Untitled2R.sav'.
DATASET NAME DataSet1 WINDOW=FRONT.
FREQUENCIES VARIABLES=Clinic# @1a.Nameoforganization@1b.WebsiteURL@1c.
Datewebsitcoded
    @1d.PrimarymaincliniclocationwithinCanada @1e.
Whetherthecompanyhasaconnectiontoaforeignprovider
    @2a.Stemcellofferings @2b.
Isstemcelltherapyautologousallogeneicorxenogeneic
    @2c.Isthestemcelllineagespecified@2d.Stemcellsource
    @2e.Aretransplantprocessingorqualityassuranceprocedurespecified @2f.
Transplantationprocedure
    @2g.Isimmunerejectionofthegraftaddressedinthetreatmentprotocol @2h.
Thetreatmentisportrayedasbeing
    @2i.Istherementionofclinicaltrialsconductedatclinic@2j.Treatmentcost
    @2k.Ifcostfiguresorrangesareprovidedspecified@3a.Howthetreatmentworks
    @3b.StemcellsanddiseaseSiteportraysadeficiencyinafinitepoolofste
    @3c.Isthetreatmentisportrayedasrevolutionaryi.e.amarkeddeparture
    @3d.Isthetreatmentportrayedastheclinicalapplicationofroutineorfa
    @3e.Thesiteappealstoholisticnaturalormagicalpowersofrenewal
    @3f.Thesiteappealstothescientificdeconstructionofhealthandillnes
    @3g.Knowledgeisportrayedasbeingincompleteoruncertain
    @3h.Knowledgeisportrayedasbeingadvancedorcertain@3i.
Claimsaresubstantiatedmainlyby
    @4a.IndicationsAssociatedConditionsMannerofpresentation @4b.
Indeterminatevocabulary
    @4c.Associateddiseases@4d.Is"aging"anindication
    @4e.Are cosmeticorlifestyleenhancementpurposesgivenasindications
    @4f.Areanyconditionsorpatientsexcluded
    @5a.EfficacyoftreatmentDoeswebsitementiondiscussefficacyoftreatm
    @5b.Ifyesisanyevidenceforefficacyprovided@6a.
BenefitsoftreatmentMannerofpresentation
    @6b.Treatmentappearsgenerallybeneficial@6c.Associatedbenefitsinclude@6d.
Likelihoodofbenefits
    @7a.RisksoftreatmentMannerofpresentation@7b.Treatmentappearsgenerallysafe
    @7c.Associatedrisksinclude@7d.Likelihoodofrisks@8a.
EthicalissuesAresocialethicalissuesmentioned
    @8b.Relevancy @8c.Hastreatmentreceivedanyofficialapprovals
    @9a.WebsiteaestheticsandintendedaudienceThiswebsiteappearstotarg

```

@9b. Website appeal - the website appeals mainly through @9c. Visual style - the website is mainly @9d. Language - the website's language is mainly @9e. Disclaimers/Legality - the website provides @10. Other services available at clinic @11. Please provide any other information that may seem relevant or provide @12. Does the website mention or discuss Canadian law/regulations relating /ORDER=ANALYSIS.

## Frequencies

### Notes

|                        |                                |                                                                                               |
|------------------------|--------------------------------|-----------------------------------------------------------------------------------------------|
| Output Created         |                                | 12-JAN-2018 11:56:00                                                                          |
| Comments               |                                |                                                                                               |
| Input                  | Data                           | C:<br>\Users\luogbo\Dropbox\IM<br>PACT<br>GRANT\rescclinicstudycod<br>ingframe\Untitled2R.sav |
|                        | Active Dataset                 | DataSet1                                                                                      |
|                        | Filter                         | <none>                                                                                        |
|                        | Weight                         | <none>                                                                                        |
|                        | Split File                     | <none>                                                                                        |
|                        | N of Rows in Working Data File | 15                                                                                            |
| Missing Value Handling | Definition of Missing          | User-defined missing values are treated as missing.                                           |
|                        | Cases Used                     | Statistics are based on all cases with valid data.                                            |

## Notes

Syntax

### FREQUENCIES

VARIABLES=Clinic# @1a.

Nameoforganization @1b.

WebsiteURL @1c.

Datewebsitecoded

@1d.

Primarymaincliniclocation  
withinCanada @1e.

Whetherthecompanyhasac  
onnectiontoforeignprovid  
er

@2a.Stemcellofferings

@2b.

Isstemcelltherapyautologo  
usallogeneicorxenogeneic

@2c.

Isthemstemcelllineagespecifi  
ed @2d.Stemcellsource

@2e.

Aretransplantprocessingor  
qualityassuranceprocedur  
esspecified @2f.

Transplantationprocedure

@2g.

Isimmunerejectionofthegra  
ftaddressedinthetreatment  
protocol @2h.

Thetreatmentisportrayeda  
sbeing

@2i.

Istherementionofclinicaltria  
Isconductedatclinic @2j.

Treatmentcost

@2k.

Ifcostfiguresorangesarepr  
ovidedspecify @3a.

Howthetreatmentworks

@3b.

StemcellsanddiseaseSitep  
ortraysadeficiencyinfinite  
poolofste

@3c.

Isthetreatmentisportrayeda  
srevolutionaryi.e.

amarkeddeparture

@3d.

Isthetreatmentportrayedas  
theclinicalapplicationofrout  
ineorfa

@3e.

Thesiteappealstoholisticna  
turalormagicalpowersofren  
ewal

@3f.

Thesiteappealstothescienti  
ficdeconstructionofhealtha  
ndillnes

@3g.

Knowledgeisportrayedasb  
eingincompleteoruncertain

@3h.

### Notes

|           |                |             |
|-----------|----------------|-------------|
| Resources | Processor Time | 00:00:00.08 |
|           | Elapsed Time   | 00:00:00.05 |

[DataSet1] C:\Users\uogbo\Dropbox\IMPACT GRANT\rescclinicstudycodingframe\Untitled2R.sav

### Statistics

|   |         | Clinic # | 1a. Name of organization | 1b. Website URL | 1c. Date website coded | 1d. Primary/main clinic location within Canada |
|---|---------|----------|--------------------------|-----------------|------------------------|------------------------------------------------|
| N | Valid   | 15       | 15                       | 15              | 15                     | 15                                             |
|   | Missing | 0        | 0                        | 0               | 0                      | 0                                              |

### Statistics

|   |         | 1e. Whether the company has a connection to a foreign provider | 2a. Stem cell offerings | 2b. Is stem cell therapy autologous, allogeneic, or xenogeneic? | 2c. Is the stem cell lineage specified? | 2d. Stem cell source |
|---|---------|----------------------------------------------------------------|-------------------------|-----------------------------------------------------------------|-----------------------------------------|----------------------|
| N | Valid   | 15                                                             | 15                      | 15                                                              | 15                                      | 15                   |
|   | Missing | 0                                                              | 0                       | 0                                                               | 0                                       | 0                    |

### Statistics

|   |         | 2e. Are transplant processing or quality assurance procedures specified? | 2f. Transplantation procedure | 2g. Is immune rejection of the graft addressed in the treatment protocol? | 2h. The treatment is portrayed as being | 2i. Is there mention of clinical trials conducted at clinic? |
|---|---------|--------------------------------------------------------------------------|-------------------------------|---------------------------------------------------------------------------|-----------------------------------------|--------------------------------------------------------------|
| N | Valid   | 15                                                                       | 15                            | 15                                                                        | 15                                      | 15                                                           |
|   | Missing | 0                                                                        | 0                             | 0                                                                         | 0                                       | 0                                                            |

### Statistics

|   |         | 2j. Treatment cost | 2k. If cost figures or ranges are provided, specify. | 3a. How the treatment works | 3b. Stem cells and disease: Site portrays a deficiency in a finite pool of stem cells as a major mechanism or contributor to disease. | 3c. Is the treatment is portrayed as revolutionary, i. e.: a marked departure from current therapies? |
|---|---------|--------------------|------------------------------------------------------|-----------------------------|---------------------------------------------------------------------------------------------------------------------------------------|-------------------------------------------------------------------------------------------------------|
| N | Valid   | 15                 | 0                                                    | 15                          | 15                                                                                                                                    | 15                                                                                                    |
|   | Missing | 0                  | 15                                                   | 0                           | 0                                                                                                                                     | 0                                                                                                     |

### Statistics

|   |         | 3d. Is the treatment portrayed as the clinical application of routine or familiar procedures? | 3e. The site appeals to holistic, natural, or magical powers of renewal | 3f. The site appeals to the scientific deconstruction of health and illness | 3g. Knowledge is portrayed as being incomplete or uncertain | 3h. Knowledge is portrayed as being advanced or certain |
|---|---------|-----------------------------------------------------------------------------------------------|-------------------------------------------------------------------------|-----------------------------------------------------------------------------|-------------------------------------------------------------|---------------------------------------------------------|
| N | Valid   | 15                                                                                            | 15                                                                      | 15                                                                          | 15                                                          | 15                                                      |
|   | Missing | 0                                                                                             | 0                                                                       | 0                                                                           | 0                                                           | 0                                                       |

### Statistics

|   |         | 3i. Claims are substantiated mainly by ... | 4a. Indications/Associated Conditions - Manner of presentation | 4b. Indeterminate vocabulary | 4c. Associated diseases | 4d. Is "aging" an indication? |
|---|---------|--------------------------------------------|----------------------------------------------------------------|------------------------------|-------------------------|-------------------------------|
| N | Valid   | 15                                         | 15                                                             | 15                           | 15                      | 15                            |
|   | Missing | 0                                          | 0                                                              | 0                            | 0                       | 0                             |

### Statistics

|   |         | 4e. Are cosmetic or lifestyle enhancement purposes given as indications? | 4f. Are any conditions or patients excluded? | 5a. Efficacy of treatment - Does website mention/discuss efficacy of treatment? | 5b. If yes, is any evidence for efficacy provided? | 6a. Benefits of treatment - Manner of presentation |
|---|---------|--------------------------------------------------------------------------|----------------------------------------------|---------------------------------------------------------------------------------|----------------------------------------------------|----------------------------------------------------|
| N | Valid   | 15                                                                       | 15                                           | 15                                                                              | 15                                                 | 15                                                 |
|   | Missing | 0                                                                        | 0                                            | 0                                                                               | 0                                                  | 0                                                  |

### Statistics

|   |         | 6b. Treatment appears generally beneficial | 6c. Associated benefits include | 6d. Likelihood of benefits | 7a. Risks of treatment - Manner of presentation | 7b. Treatment appears generally safe |
|---|---------|--------------------------------------------|---------------------------------|----------------------------|-------------------------------------------------|--------------------------------------|
| N | Valid   | 15                                         | 15                              | 15                         | 15                                              | 15                                   |
|   | Missing | 0                                          | 0                               | 0                          | 0                                               | 0                                    |

### Statistics

|   |         | 7c. Associated risks include | 7d. Likelihood of risks | 8a. Ethical issues - Are social/ethical issues mentioned? | 8b. Relevancy | 8c. Has treatment received any official approvals? |
|---|---------|------------------------------|-------------------------|-----------------------------------------------------------|---------------|----------------------------------------------------|
| N | Valid   | 15                           | 15                      | 15                                                        | 15            | 15                                                 |
|   | Missing | 0                            | 0                       | 0                                                         | 0             | 0                                                  |

### Statistics

|   |         | 9a. Website aesthetics and intended audience - This website appears to target | 9b. Website appeal – the website appeals mainly through | 9c. Visual style – the website is mainly ... | 9d. Language – the website's language is mainly | 9e. Disclaimers/ Legality – the website provides |
|---|---------|-------------------------------------------------------------------------------|---------------------------------------------------------|----------------------------------------------|-------------------------------------------------|--------------------------------------------------|
| N | Valid   | 15                                                                            | 15                                                      | 15                                           | 15                                              | 15                                               |
|   | Missing | 0                                                                             | 0                                                       | 0                                            | 0                                               | 0                                                |

### Statistics

|   |         | 10. Other services available at clinic | 11. Please provide any other information that may seem relevant, or provides quotations of language used. | 12. Does the website mention or discuss Canadian law/regulations relating to stem cells, embryonic stem cells or iPSCs? |
|---|---------|----------------------------------------|-----------------------------------------------------------------------------------------------------------|-------------------------------------------------------------------------------------------------------------------------|
| N | Valid   | 15                                     | 0                                                                                                         | 15                                                                                                                      |
|   | Missing | 0                                      | 15                                                                                                        | 0                                                                                                                       |

## Frequency Table

**Clinic #**

|       |       | Frequency | Percent | Valid Percent | Cumulative Percent |
|-------|-------|-----------|---------|---------------|--------------------|
| Valid | 1     | 1         | 6.7     | 6.7           | 6.7                |
|       | 2     | 1         | 6.7     | 6.7           | 13.3               |
|       | 3     | 1         | 6.7     | 6.7           | 20.0               |
|       | 4     | 1         | 6.7     | 6.7           | 26.7               |
|       | 5     | 1         | 6.7     | 6.7           | 33.3               |
|       | 6     | 1         | 6.7     | 6.7           | 40.0               |
|       | 7     | 1         | 6.7     | 6.7           | 46.7               |
|       | 8     | 1         | 6.7     | 6.7           | 53.3               |
|       | 9     | 1         | 6.7     | 6.7           | 60.0               |
|       | 10    | 1         | 6.7     | 6.7           | 66.7               |
|       | 11    | 1         | 6.7     | 6.7           | 73.3               |
|       | 12    | 1         | 6.7     | 6.7           | 80.0               |
|       | 13    | 1         | 6.7     | 6.7           | 86.7               |
|       | 14    | 1         | 6.7     | 6.7           | 93.3               |
|       | 15    | 1         | 6.7     | 6.7           | 100.0              |
|       | Total | 15        | 100.0   | 100.0         |                    |



### 1a. Name of organization

|       |                                                      | Frequency | Percent | Valid Percent | Cumulative Percent |
|-------|------------------------------------------------------|-----------|---------|---------------|--------------------|
| Valid | CAPRI (Central Alberta Pain & Rehab Institute)       | 1         | 6.7     | 6.7           | 6.7                |
|       | Cleveland Clinic Canada                              | 1         | 6.7     | 6.7           | 13.3               |
|       | Clinique du Docteur Sylvain Simard                   | 1         | 6.7     | 6.7           | 20.0               |
|       | Dash & Reed Sport Medicine                           | 1         | 6.7     | 6.7           | 26.7               |
|       | Global Healthcare Connections Inc.                   | 1         | 6.7     | 6.7           | 33.3               |
|       | Hair Renewal Specialists                             | 1         | 6.7     | 6.7           | 40.0               |
|       | Horizon Joint Rejuvenation Center                    | 1         | 6.7     | 6.7           | 46.7               |
|       | Inovo Medical                                        | 1         | 6.7     | 6.7           | 53.3               |
|       | KOPI (Kingston Orthopaedic Pain Institute) Stem Cell | 1         | 6.7     | 6.7           | 60.0               |
|       | Orthopaedic Sport Institute                          | 1         | 6.7     | 6.7           | 66.7               |
|       | Pagdin Health                                        | 1         | 6.7     | 6.7           | 73.3               |
|       | Phoenix MedSpa                                       | 1         | 6.7     | 6.7           | 80.0               |
|       | Provincial Oral Surgery                              | 1         | 6.7     | 6.7           | 86.7               |
|       | RegenaStem (BioLinc Brock University)                | 1         | 6.7     | 6.7           | 93.3               |
|       | SEMI (Sports & Exercise Medicine Institute)          | 1         | 6.7     | 6.7           | 100.0              |
|       | Total                                                | 15        | 100.0   | 100.0         |                    |

### 1b. Website URL

|       |                                                                                                                                                                                                                                                           | Frequency | Percent | Valid Percent | Cumulative Percent |
|-------|-----------------------------------------------------------------------------------------------------------------------------------------------------------------------------------------------------------------------------------------------------------|-----------|---------|---------------|--------------------|
| Valid | <a href="http://dashreed.ca/our-services/sport-medicine/">http://dashreed.ca/our-services/sport-medicine/</a>                                                                                                                                             | 1         | 6.7     | 6.7           | 6.7                |
|       | <a href="http://inovomedical.ca/services/about-regenerative-medicine/tissue-renewal-with-stem-cell-injections">http://inovomedical.ca/services/about-regenerative-medicine/tissue-renewal-with-stem-cell-injections</a>                                   | 1         | 6.7     | 6.7           | 13.3               |
|       | <a href="http://www.capriclinic.ca/">http://www.capriclinic.ca/</a>                                                                                                                                                                                       | 1         | 6.7     | 6.7           | 20.0               |
|       | <a href="http://www.cellulesouches.ca/?lang=en">http://www.cellulesouches.ca/?lang=en</a>                                                                                                                                                                 | 1         | 6.7     | 6.7           | 26.7               |
|       | <a href="http://www.drgrantpagdin.com/services/stem-cell-medicine/">http://www.drgrantpagdin.com/services/stem-cell-medicine/</a>                                                                                                                         | 1         | 6.7     | 6.7           | 33.3               |
|       | <a href="http://www.globalhealthcareconnections.com/html/procedures/Oncology-Cancer-Care-/Stem-Cell-Cancer-Treatment/index.cfm">http://www.globalhealthcareconnections.com/html/procedures/Oncology-Cancer-Care-/Stem-Cell-Cancer-Treatment/index.cfm</a> | 1         | 6.7     | 6.7           | 40.0               |
|       | <a href="http://www.hairrenewalspecialists.com/how-we-do-it/">http://www.hairrenewalspecialists.com/how-we-do-it/</a>                                                                                                                                     | 1         | 6.7     | 6.7           | 46.7               |
|       | <a href="http://www.phoenixmedspa.ca/stem-cell-therapy.php">http://www.phoenixmedspa.ca/stem-cell-therapy.php</a>                                                                                                                                         | 1         | 6.7     | 6.7           | 53.3               |
|       | <a href="http://www.regenastem.com/company.html">http://www.regenastem.com/company.html</a>                                                                                                                                                               | 1         | 6.7     | 6.7           | 60.0               |
|       | <a href="http://www.semisportmed.com/stem-cell-transplantation.html">http://www.semisportmed.com/stem-cell-transplantation.html</a>                                                                                                                       | 1         | 6.7     | 6.7           | 66.7               |
|       | <a href="https://my.clevelandclinic.org/canada/services/prp-stem-cell-injections">https://my.clevelandclinic.org/canada/services/prp-stem-cell-injections</a>                                                                                             | 1         | 6.7     | 6.7           | 73.3               |
|       | <a href="https://ortho-sport.ca/service/stem-cell-injection/">https://ortho-sport.ca/service/stem-cell-injection/</a>                                                                                                                                     | 1         | 6.7     | 6.7           | 80.0               |
|       | <a href="https://provincialoralsurgery.com/stem-cells.php">https://provincialoralsurgery.com/stem-cells.php</a>                                                                                                                                           | 1         | 6.7     | 6.7           | 86.7               |
|       | <a href="https://www.hjrcentre.com/">https://www.hjrcentre.com/</a>                                                                                                                                                                                       | 1         | 6.7     | 6.7           | 93.3               |

### 1b. Website URL

|                               | Frequency | Percent | Valid Percent | Cumulative Percent |
|-------------------------------|-----------|---------|---------------|--------------------|
| https://www.kopistemcells.ca/ | 1         | 6.7     | 6.7           | 100.0              |
| Total                         | 15        | 100.0   | 100.0         |                    |

### 1c. Date website coded

|       |            | Frequency | Percent | Valid Percent | Cumulative Percent |
|-------|------------|-----------|---------|---------------|--------------------|
| Valid | 08/21/2017 | 3         | 20.0    | 20.0          | 20.0               |
|       | 08/28/2017 | 1         | 6.7     | 6.7           | 26.7               |
|       | 08/30/2017 | 2         | 13.3    | 13.3          | 40.0               |
|       | 08/31/2017 | 3         | 20.0    | 20.0          | 60.0               |
|       | 09/01/2017 | 6         | 40.0    | 40.0          | 100.0              |
|       | Total      | 15        | 100.0   | 100.0         |                    |

### 1d. Primary/main clinic location within Canada

|       |       | Frequency | Percent | Valid Percent | Cumulative Percent |
|-------|-------|-----------|---------|---------------|--------------------|
| Valid | 1     | 1         | 6.7     | 6.7           | 6.7                |
|       | 2     | 2         | 13.3    | 13.3          | 20.0               |
|       | 3     | 3         | 20.0    | 20.0          | 40.0               |
|       | 5     | 7         | 46.7    | 46.7          | 86.7               |
|       | 6     | 1         | 6.7     | 6.7           | 93.3               |
|       | 10    | 1         | 6.7     | 6.7           | 100.0              |
|       | Total | 15        | 100.0   | 100.0         |                    |

### 1e. Whether the company has a connection to a foreign provider

|       |       | Frequency | Percent | Valid Percent | Cumulative Percent |
|-------|-------|-----------|---------|---------------|--------------------|
| Valid | 0     | 10        | 66.7    | 66.7          | 66.7               |
|       | 4     | 1         | 6.7     | 6.7           | 73.3               |
|       | 5     | 1         | 6.7     | 6.7           | 80.0               |
|       | 99    | 3         | 20.0    | 20.0          | 100.0              |
|       | Total | 15        | 100.0   | 100.0         |                    |

**2a. Stem cell offerings**

|       |       | Frequency | Percent | Valid Percent | Cumulative Percent |
|-------|-------|-----------|---------|---------------|--------------------|
| Valid | 0     | 2         | 13.3    | 13.3          | 13.3               |
|       | 3     | 13        | 86.7    | 86.7          | 100.0              |
|       | Total | 15        | 100.0   | 100.0         |                    |

**2b. Is stem cell therapy autologous, allogeneic, or xenogeneic?**

|       |       | Frequency | Percent | Valid Percent | Cumulative Percent |
|-------|-------|-----------|---------|---------------|--------------------|
| Valid | 0     | 4         | 26.7    | 26.7          | 26.7               |
|       | 1     | 11        | 73.3    | 73.3          | 100.0              |
|       | Total | 15        | 100.0   | 100.0         |                    |

**2c. Is the stem cell lineage specified?**

|       |       | Frequency | Percent | Valid Percent | Cumulative Percent |
|-------|-------|-----------|---------|---------------|--------------------|
| Valid | 0     | 5         | 33.3    | 33.3          | 33.3               |
|       | 3     | 6         | 40.0    | 40.0          | 73.3               |
|       | 4     | 4         | 26.7    | 26.7          | 100.0              |
|       | Total | 15        | 100.0   | 100.0         |                    |

**2d. Stem cell source**

|       |       | Frequency | Percent | Valid Percent | Cumulative Percent |
|-------|-------|-----------|---------|---------------|--------------------|
| Valid | 0     | 2         | 13.3    | 13.3          | 13.3               |
|       | 1     | 3         | 20.0    | 20.0          | 33.3               |
|       | 2     | 6         | 40.0    | 40.0          | 73.3               |
|       | 5     | 1         | 6.7     | 6.7           | 80.0               |
|       | 6     | 3         | 20.0    | 20.0          | 100.0              |
|       | Total | 15        | 100.0   | 100.0         |                    |

**2e. Are transplant processing or quality assurance procedures specified?**

|       |   | Frequency | Percent | Valid Percent | Cumulative Percent |
|-------|---|-----------|---------|---------------|--------------------|
| Valid | 0 | 15        | 100.0   | 100.0         | 100.0              |

## 2f. Transplantation procedure

|       |       | Frequency | Percent | Valid Percent | Cumulative Percent |
|-------|-------|-----------|---------|---------------|--------------------|
| Valid | 0     | 5         | 33.3    | 33.3          | 33.3               |
|       | 1     | 1         | 6.7     | 6.7           | 40.0               |
|       | 2     | 6         | 40.0    | 40.0          | 80.0               |
|       | 5     | 3         | 20.0    | 20.0          | 100.0              |
|       | Total | 15        | 100.0   | 100.0         |                    |

## 2g. Is immune rejection of the graft addressed in the treatment protocol?

|       |   | Frequency | Percent | Valid Percent | Cumulative Percent |
|-------|---|-----------|---------|---------------|--------------------|
| Valid | 0 | 15        | 100.0   | 100.0         | 100.0              |

## 2h. The treatment is portrayed as being

|       |       | Frequency | Percent | Valid Percent | Cumulative Percent |
|-------|-------|-----------|---------|---------------|--------------------|
| Valid | 0     | 1         | 6.7     | 6.7           | 6.7                |
|       | 1     | 1         | 6.7     | 6.7           | 13.3               |
|       | 2     | 10        | 66.7    | 66.7          | 80.0               |
|       | 3     | 3         | 20.0    | 20.0          | 100.0              |
|       | Total | 15        | 100.0   | 100.0         |                    |

## 2i. Is there mention of clinical trials conducted at clinic?

|       |   | Frequency | Percent | Valid Percent | Cumulative Percent |
|-------|---|-----------|---------|---------------|--------------------|
| Valid | 0 | 15        | 100.0   | 100.0         | 100.0              |

## 2j. Treatment cost

|       |       | Frequency | Percent | Valid Percent | Cumulative Percent |
|-------|-------|-----------|---------|---------------|--------------------|
| Valid | 0     | 14        | 93.3    | 93.3          | 93.3               |
|       | 1     | 1         | 6.7     | 6.7           | 100.0              |
|       | Total | 15        | 100.0   | 100.0         |                    |

**2k. If cost figures or ranges are provided, specify.**

|         |        | Frequency | Percent |
|---------|--------|-----------|---------|
| Missing | System | 15        | 100.0   |

**3a. How the treatment works**

|       |       | Frequency | Percent | Valid Percent | Cumulative Percent |
|-------|-------|-----------|---------|---------------|--------------------|
| Valid | 0     | 7         | 46.7    | 46.7          | 46.7               |
|       | 4     | 7         | 46.7    | 46.7          | 93.3               |
|       | 5     | 1         | 6.7     | 6.7           | 100.0              |
|       | Total | 15        | 100.0   | 100.0         |                    |

**3b. Stem cells and disease: Site portrays a deficiency in a finite pool of stem cells as a major mechanism or contributor to disease.**

|       |   | Frequency | Percent | Valid Percent | Cumulative Percent |
|-------|---|-----------|---------|---------------|--------------------|
| Valid | 1 | 15        | 100.0   | 100.0         | 100.0              |

**3c. Is the treatment is portrayed as revolutionary, i.e.: a marked departure from current therapies?**

|       |       | Frequency | Percent | Valid Percent | Cumulative Percent |
|-------|-------|-----------|---------|---------------|--------------------|
| Valid | 1     | 1         | 6.7     | 6.7           | 6.7                |
|       | 2     | 9         | 60.0    | 60.0          | 66.7               |
|       | 3     | 5         | 33.3    | 33.3          | 100.0              |
|       | Total | 15        | 100.0   | 100.0         |                    |

**3d. Is the treatment portrayed as the clinical application of routine or familiar procedures?**

|       |       | Frequency | Percent | Valid Percent | Cumulative Percent |
|-------|-------|-----------|---------|---------------|--------------------|
| Valid | 1     | 1         | 6.7     | 6.7           | 6.7                |
|       | 2     | 11        | 73.3    | 73.3          | 80.0               |
|       | 3     | 3         | 20.0    | 20.0          | 100.0              |
|       | Total | 15        | 100.0   | 100.0         |                    |

**3e. The site appeals to holistic, natural, or magical powers of renewal**

|       |       | Frequency | Percent | Valid Percent | Cumulative Percent |
|-------|-------|-----------|---------|---------------|--------------------|
| Valid | 1     | 14        | 93.3    | 93.3          | 93.3               |
|       | 2     | 1         | 6.7     | 6.7           | 100.0              |
|       | Total | 15        | 100.0   | 100.0         |                    |

**3f. The site appeals to the scientific deconstruction of health and illness**

|       |       | Frequency | Percent | Valid Percent | Cumulative Percent |
|-------|-------|-----------|---------|---------------|--------------------|
| Valid | 1     | 14        | 93.3    | 93.3          | 93.3               |
|       | 2     | 1         | 6.7     | 6.7           | 100.0              |
|       | Total | 15        | 100.0   | 100.0         |                    |

**3g. Knowledge is portrayed as being incomplete or uncertain**

|       |       | Frequency | Percent | Valid Percent | Cumulative Percent |
|-------|-------|-----------|---------|---------------|--------------------|
| Valid | 1     | 10        | 66.7    | 66.7          | 66.7               |
|       | 2     | 4         | 26.7    | 26.7          | 93.3               |
|       | 3     | 1         | 6.7     | 6.7           | 100.0              |
|       | Total | 15        | 100.0   | 100.0         |                    |

**3h. Knowledge is portrayed as being advanced or certain**

|       |       | Frequency | Percent | Valid Percent | Cumulative Percent |
|-------|-------|-----------|---------|---------------|--------------------|
| Valid | 1     | 1         | 6.7     | 6.7           | 6.7                |
|       | 2     | 11        | 73.3    | 73.3          | 80.0               |
|       | 3     | 3         | 20.0    | 20.0          | 100.0              |
|       | Total | 15        | 100.0   | 100.0         |                    |

### 3i. Claims are substantiated mainly by ...

|       |       | Frequency | Percent | Valid Percent | Cumulative Percent |
|-------|-------|-----------|---------|---------------|--------------------|
| Valid | 0     | 8         | 53.3    | 53.3          | 53.3               |
|       | 4     | 1         | 6.7     | 6.7           | 60.0               |
|       | 6     | 3         | 20.0    | 20.0          | 80.0               |
|       | 7     | 1         | 6.7     | 6.7           | 86.7               |
|       | 10    | 2         | 13.3    | 13.3          | 100.0              |
|       | Total | 15        | 100.0   | 100.0         |                    |

### 4a. Indications/Associated Conditions - Manner of presentation

|       |       | Frequency | Percent | Valid Percent | Cumulative Percent |
|-------|-------|-----------|---------|---------------|--------------------|
| Valid | 0     | 6         | 40.0    | 40.0          | 40.0               |
|       | 2     | 9         | 60.0    | 60.0          | 100.0              |
|       | Total | 15        | 100.0   | 100.0         |                    |

### 4b. Indeterminate vocabulary

|       |       | Frequency | Percent | Valid Percent | Cumulative Percent |
|-------|-------|-----------|---------|---------------|--------------------|
| Valid | 0     | 13        | 86.7    | 86.7          | 86.7               |
|       | 1     | 2         | 13.3    | 13.3          | 100.0              |
|       | Total | 15        | 100.0   | 100.0         |                    |

### 4c. Associated diseases

|       |       | Frequency | Percent | Valid Percent | Cumulative Percent |
|-------|-------|-----------|---------|---------------|--------------------|
| Valid | 0     | 7         | 46.7    | 46.7          | 46.7               |
|       | 6     | 5         | 33.3    | 33.3          | 80.0               |
|       | 11    | 3         | 20.0    | 20.0          | 100.0              |
|       | Total | 15        | 100.0   | 100.0         |                    |



**4d. Is “aging” an indication?**

|       |       | Frequency | Percent | Valid Percent | Cumulative Percent |
|-------|-------|-----------|---------|---------------|--------------------|
| Valid | 0     | 13        | 86.7    | 86.7          | 86.7               |
|       | 1     | 2         | 13.3    | 13.3          | 100.0              |
|       | Total | 15        | 100.0   | 100.0         |                    |

**4e. Are cosmetic or lifestyle enhancement purposes given as indications?**

|       |       | Frequency | Percent | Valid Percent | Cumulative Percent |
|-------|-------|-----------|---------|---------------|--------------------|
| Valid | 0     | 10        | 66.7    | 66.7          | 66.7               |
|       | 1     | 2         | 13.3    | 13.3          | 80.0               |
|       | 2     | 1         | 6.7     | 6.7           | 86.7               |
|       | 3     | 2         | 13.3    | 13.3          | 100.0              |
|       | Total | 15        | 100.0   | 100.0         |                    |

**4f. Are any conditions or patients excluded?**

|       |       | Frequency | Percent | Valid Percent | Cumulative Percent |
|-------|-------|-----------|---------|---------------|--------------------|
| Valid | 0     | 12        | 80.0    | 80.0          | 80.0               |
|       | 1     | 1         | 6.7     | 6.7           | 86.7               |
|       | 4     | 2         | 13.3    | 13.3          | 100.0              |
|       | Total | 15        | 100.0   | 100.0         |                    |

**5a. Efficacy of treatment - Does website mention/discuss efficacy of treatment?**

|       |       | Frequency | Percent | Valid Percent | Cumulative Percent |
|-------|-------|-----------|---------|---------------|--------------------|
| Valid | 0     | 7         | 46.7    | 46.7          | 46.7               |
|       | 1     | 8         | 53.3    | 53.3          | 100.0              |
|       | Total | 15        | 100.0   | 100.0         |                    |

**5b. If yes, is any evidence for efficacy provided?**

|       |       | Frequency | Percent | Valid Percent | Cumulative Percent |
|-------|-------|-----------|---------|---------------|--------------------|
| Valid | 0     | 3         | 20.0    | 20.0          | 20.0               |
|       | 1     | 2         | 13.3    | 13.3          | 33.3               |
|       | 2     | 2         | 13.3    | 13.3          | 46.7               |
|       | 4     | 1         | 6.7     | 6.7           | 53.3               |
|       | 99    | 7         | 46.7    | 46.7          | 100.0              |
|       | Total | 15        | 100.0   | 100.0         |                    |

**6a. Benefits of treatment - Manner of presentation**

|       |       | Frequency | Percent | Valid Percent | Cumulative Percent |
|-------|-------|-----------|---------|---------------|--------------------|
| Valid | 0     | 5         | 33.3    | 33.3          | 33.3               |
|       | 1     | 1         | 6.7     | 6.7           | 40.0               |
|       | 2     | 9         | 60.0    | 60.0          | 100.0              |
|       | Total | 15        | 100.0   | 100.0         |                    |

**6b. Treatment appears generally beneficial**

|       |       | Frequency | Percent | Valid Percent | Cumulative Percent |
|-------|-------|-----------|---------|---------------|--------------------|
| Valid | 1     | 12        | 80.0    | 80.0          | 80.0               |
|       | 99    | 3         | 20.0    | 20.0          | 100.0              |
|       | Total | 15        | 100.0   | 100.0         |                    |

**6c. Associated benefits include**

|       |       | Frequency | Percent | Valid Percent | Cumulative Percent |
|-------|-------|-----------|---------|---------------|--------------------|
| Valid | 0     | 3         | 20.0    | 20.0          | 20.0               |
|       | 1     | 10        | 66.7    | 66.7          | 86.7               |
|       | 2     | 1         | 6.7     | 6.7           | 93.3               |
|       | 4     | 1         | 6.7     | 6.7           | 100.0              |
|       | Total | 15        | 100.0   | 100.0         |                    |

### 6d. Likelihood of benefits

|       |       | Frequency | Percent | Valid Percent | Cumulative Percent |
|-------|-------|-----------|---------|---------------|--------------------|
| Valid | 0     | 3         | 20.0    | 20.0          | 20.0               |
|       | 1     | 9         | 60.0    | 60.0          | 80.0               |
|       | 4     | 2         | 13.3    | 13.3          | 93.3               |
|       | 5     | 1         | 6.7     | 6.7           | 100.0              |
|       | Total | 15        | 100.0   | 100.0         |                    |

### 7a. Risks of treatment - Manner of presentation

|       |       | Frequency | Percent | Valid Percent | Cumulative Percent |
|-------|-------|-----------|---------|---------------|--------------------|
| Valid | 0     | 11        | 73.3    | 73.3          | 73.3               |
|       | 1     | 1         | 6.7     | 6.7           | 80.0               |
|       | 2     | 2         | 13.3    | 13.3          | 93.3               |
|       | 3     | 1         | 6.7     | 6.7           | 100.0              |
|       | Total | 15        | 100.0   | 100.0         |                    |

### 7b. Treatment appears generally safe

|       |       | Frequency | Percent | Valid Percent | Cumulative Percent |
|-------|-------|-----------|---------|---------------|--------------------|
| Valid | 1     | 5         | 33.3    | 33.3          | 33.3               |
|       | 99    | 10        | 66.7    | 66.7          | 100.0              |
|       | Total | 15        | 100.0   | 100.0         |                    |

### 7c. Associated risks include

|       |       | Frequency | Percent | Valid Percent | Cumulative Percent |
|-------|-------|-----------|---------|---------------|--------------------|
| Valid | 0     | 10        | 66.7    | 66.7          | 66.7               |
|       | 3     | 1         | 6.7     | 6.7           | 73.3               |
|       | 7     | 2         | 13.3    | 13.3          | 86.7               |
|       | 8     | 1         | 6.7     | 6.7           | 93.3               |
|       | 9     | 1         | 6.7     | 6.7           | 100.0              |
|       | Total | 15        | 100.0   | 100.0         |                    |

### 7d. Likelihood of risks

|       |       | Frequency | Percent | Valid Percent | Cumulative Percent |
|-------|-------|-----------|---------|---------------|--------------------|
| Valid | 0     | 10        | 66.7    | 66.7          | 66.7               |
|       | 2     | 3         | 20.0    | 20.0          | 86.7               |
|       | 4     | 2         | 13.3    | 13.3          | 100.0              |
|       | Total | 15        | 100.0   | 100.0         |                    |

### 8a. Ethical issues - Are social/ethical issues mentioned?

|       |       | Frequency | Percent | Valid Percent | Cumulative Percent |
|-------|-------|-----------|---------|---------------|--------------------|
| Valid | 0     | 11        | 73.3    | 73.3          | 73.3               |
|       | 2     | 2         | 13.3    | 13.3          | 86.7               |
|       | 3     | 2         | 13.3    | 13.3          | 100.0              |
|       | Total | 15        | 100.0   | 100.0         |                    |

### 8b. Relevancy

|       |       | Frequency | Percent | Valid Percent | Cumulative Percent |
|-------|-------|-----------|---------|---------------|--------------------|
| Valid | 0     | 12        | 80.0    | 80.0          | 80.0               |
|       | 1     | 1         | 6.7     | 6.7           | 86.7               |
|       | 3     | 2         | 13.3    | 13.3          | 100.0              |
|       | Total | 15        | 100.0   | 100.0         |                    |

### 8c. Has treatment received any official approvals?

|       |       | Frequency | Percent | Valid Percent | Cumulative Percent |
|-------|-------|-----------|---------|---------------|--------------------|
| Valid | 0     | 14        | 93.3    | 93.3          | 93.3               |
|       | 2     | 1         | 6.7     | 6.7           | 100.0              |
|       | Total | 15        | 100.0   | 100.0         |                    |

**9a. Website aesthetics and intended audience - This website appears to target**

|       |       | Frequency | Percent | Valid Percent | Cumulative Percent |
|-------|-------|-----------|---------|---------------|--------------------|
| Valid | 1     | 11        | 73.3    | 73.3          | 73.3               |
|       | 3     | 1         | 6.7     | 6.7           | 80.0               |
|       | 6     | 3         | 20.0    | 20.0          | 100.0              |
|       | Total | 15        | 100.0   | 100.0         |                    |

**9b. Website appeal – the website appeals mainly through**

|       |       | Frequency | Percent | Valid Percent | Cumulative Percent |
|-------|-------|-----------|---------|---------------|--------------------|
| Valid | 1     | 1         | 6.7     | 6.7           | 6.7                |
|       | 4     | 2         | 13.3    | 13.3          | 20.0               |
|       | 5     | 9         | 60.0    | 60.0          | 80.0               |
|       | 8     | 1         | 6.7     | 6.7           | 86.7               |
|       | 9     | 1         | 6.7     | 6.7           | 93.3               |
|       | 10    | 1         | 6.7     | 6.7           | 100.0              |
|       | Total | 15        | 100.0   | 100.0         |                    |

**9c. Visual style – the website is mainly ...**

|       |       | Frequency | Percent | Valid Percent | Cumulative Percent |
|-------|-------|-----------|---------|---------------|--------------------|
| Valid | 1     | 3         | 20.0    | 20.0          | 20.0               |
|       | 2     | 12        | 80.0    | 80.0          | 100.0              |
|       | Total | 15        | 100.0   | 100.0         |                    |

**9d. Language – the website’s language is mainly**

|       |       | Frequency | Percent | Valid Percent | Cumulative Percent |
|-------|-------|-----------|---------|---------------|--------------------|
| Valid | 1     | 14        | 93.3    | 93.3          | 93.3               |
|       | 4     | 1         | 6.7     | 6.7           | 100.0              |
|       | Total | 15        | 100.0   | 100.0         |                    |

**9e. Disclaimers/ Legality – the website provides**

|       |       | Frequency | Percent | Valid Percent | Cumulative Percent |
|-------|-------|-----------|---------|---------------|--------------------|
| Valid | 0     | 10        | 66.7    | 66.7          | 66.7               |
|       | 1     | 1         | 6.7     | 6.7           | 73.3               |
|       | 3     | 1         | 6.7     | 6.7           | 80.0               |
|       | 5     | 3         | 20.0    | 20.0          | 100.0              |
|       | Total | 15        | 100.0   | 100.0         |                    |

**10. Other services available at clinic**

|       |       | Frequency | Percent | Valid Percent | Cumulative Percent |
|-------|-------|-----------|---------|---------------|--------------------|
| Valid | 0     | 2         | 13.3    | 13.3          | 13.3               |
|       | 9     | 1         | 6.7     | 6.7           | 20.0               |
|       | 10    | 12        | 80.0    | 80.0          | 100.0              |
|       | Total | 15        | 100.0   | 100.0         |                    |

**11. Please provide any other information that may seem relevant, or provides quotations of language used.**

|         |        | Frequency | Percent |
|---------|--------|-----------|---------|
| Missing | System | 15        | 100.0   |

**12. Does the website mention or discuss Canadian law/regulations relating to stem cells, embryonic stem cells or iPSCs?**

|       |       | Frequency | Percent | Valid Percent | Cumulative Percent |
|-------|-------|-----------|---------|---------------|--------------------|
| Valid | 0     | 12        | 80.0    | 80.0          | 80.0               |
|       | 1     | 3         | 20.0    | 20.0          | 100.0              |
|       | Total | 15        | 100.0   | 100.0         |                    |
